# Supplementary material for: Maximizing the Clinical Benefit of Radiotherapy in Solitary Plasmacytoma: An International Multicenter Analysis
Source: PubMed Central journal article supplement (PMC7139814; doi:10.3390/cancers12030676), 2020-03-13
Supplement: cancers-12-00676-s001.pdf [file cancers-12-00676-s001.pdf]

Supplementary Materials

# Maximizing the Clinical Benefit of Radiotherapy in Solitary Plasmacytoma: An International Multicenter Analysis

Khaled Elsayad, Michael Oertel, Laila König, Sebastian Hüske, Emmanuelle Le Ray, Mohamed A.M. Meheissen, Amr Abdelaziz Elsaid, Essam Elfaham, Jürgen Debus, Youlia Kirova, Klaus Herfarth and Hans Theodor Eich

Table S1. Participating international centers.

| Center Number | Principal Investigator | Address                                                                                      | Patients ( <i>n</i> ) |
|---------------|------------------------|----------------------------------------------------------------------------------------------|-----------------------|
| 1             | Khaled Elsayad         | Department of Radiation Oncology, University Hospital of Munster                             | 31                    |
| 2             | Youlia Kirova          | Department of Radiation Oncology, Institut Curie, Paris, France                              | 28                    |
| 3             |                        | Versailles St Quentin University, St Quentin, France                                         |                       |
| 4             | Laila König            | Department of Radiation Oncology, University Hospital Heidelberg, Heidelberg, Germany        | 15                    |
| 5             | Mohamed A.M. Meheissen | Department Alexandria clinical Oncology Department, Alexandria University, Alexandria, Egypt | 10                    |
| 6             |                        | Specialized universal network of Oncology (SUN), Alexandria, Egypt                           |                       |

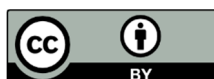

© 2020 by the authors. Licensee MDPI, Basel, Switzerland. This article is an open access article distributed under the terms and conditions of the Creative Commons Attribution (CC BY) license (<http://creativecommons.org/licenses/by/4.0/>).
